# Supplementary material
Source: PubMed Central journal article supplement (PMC1887586)

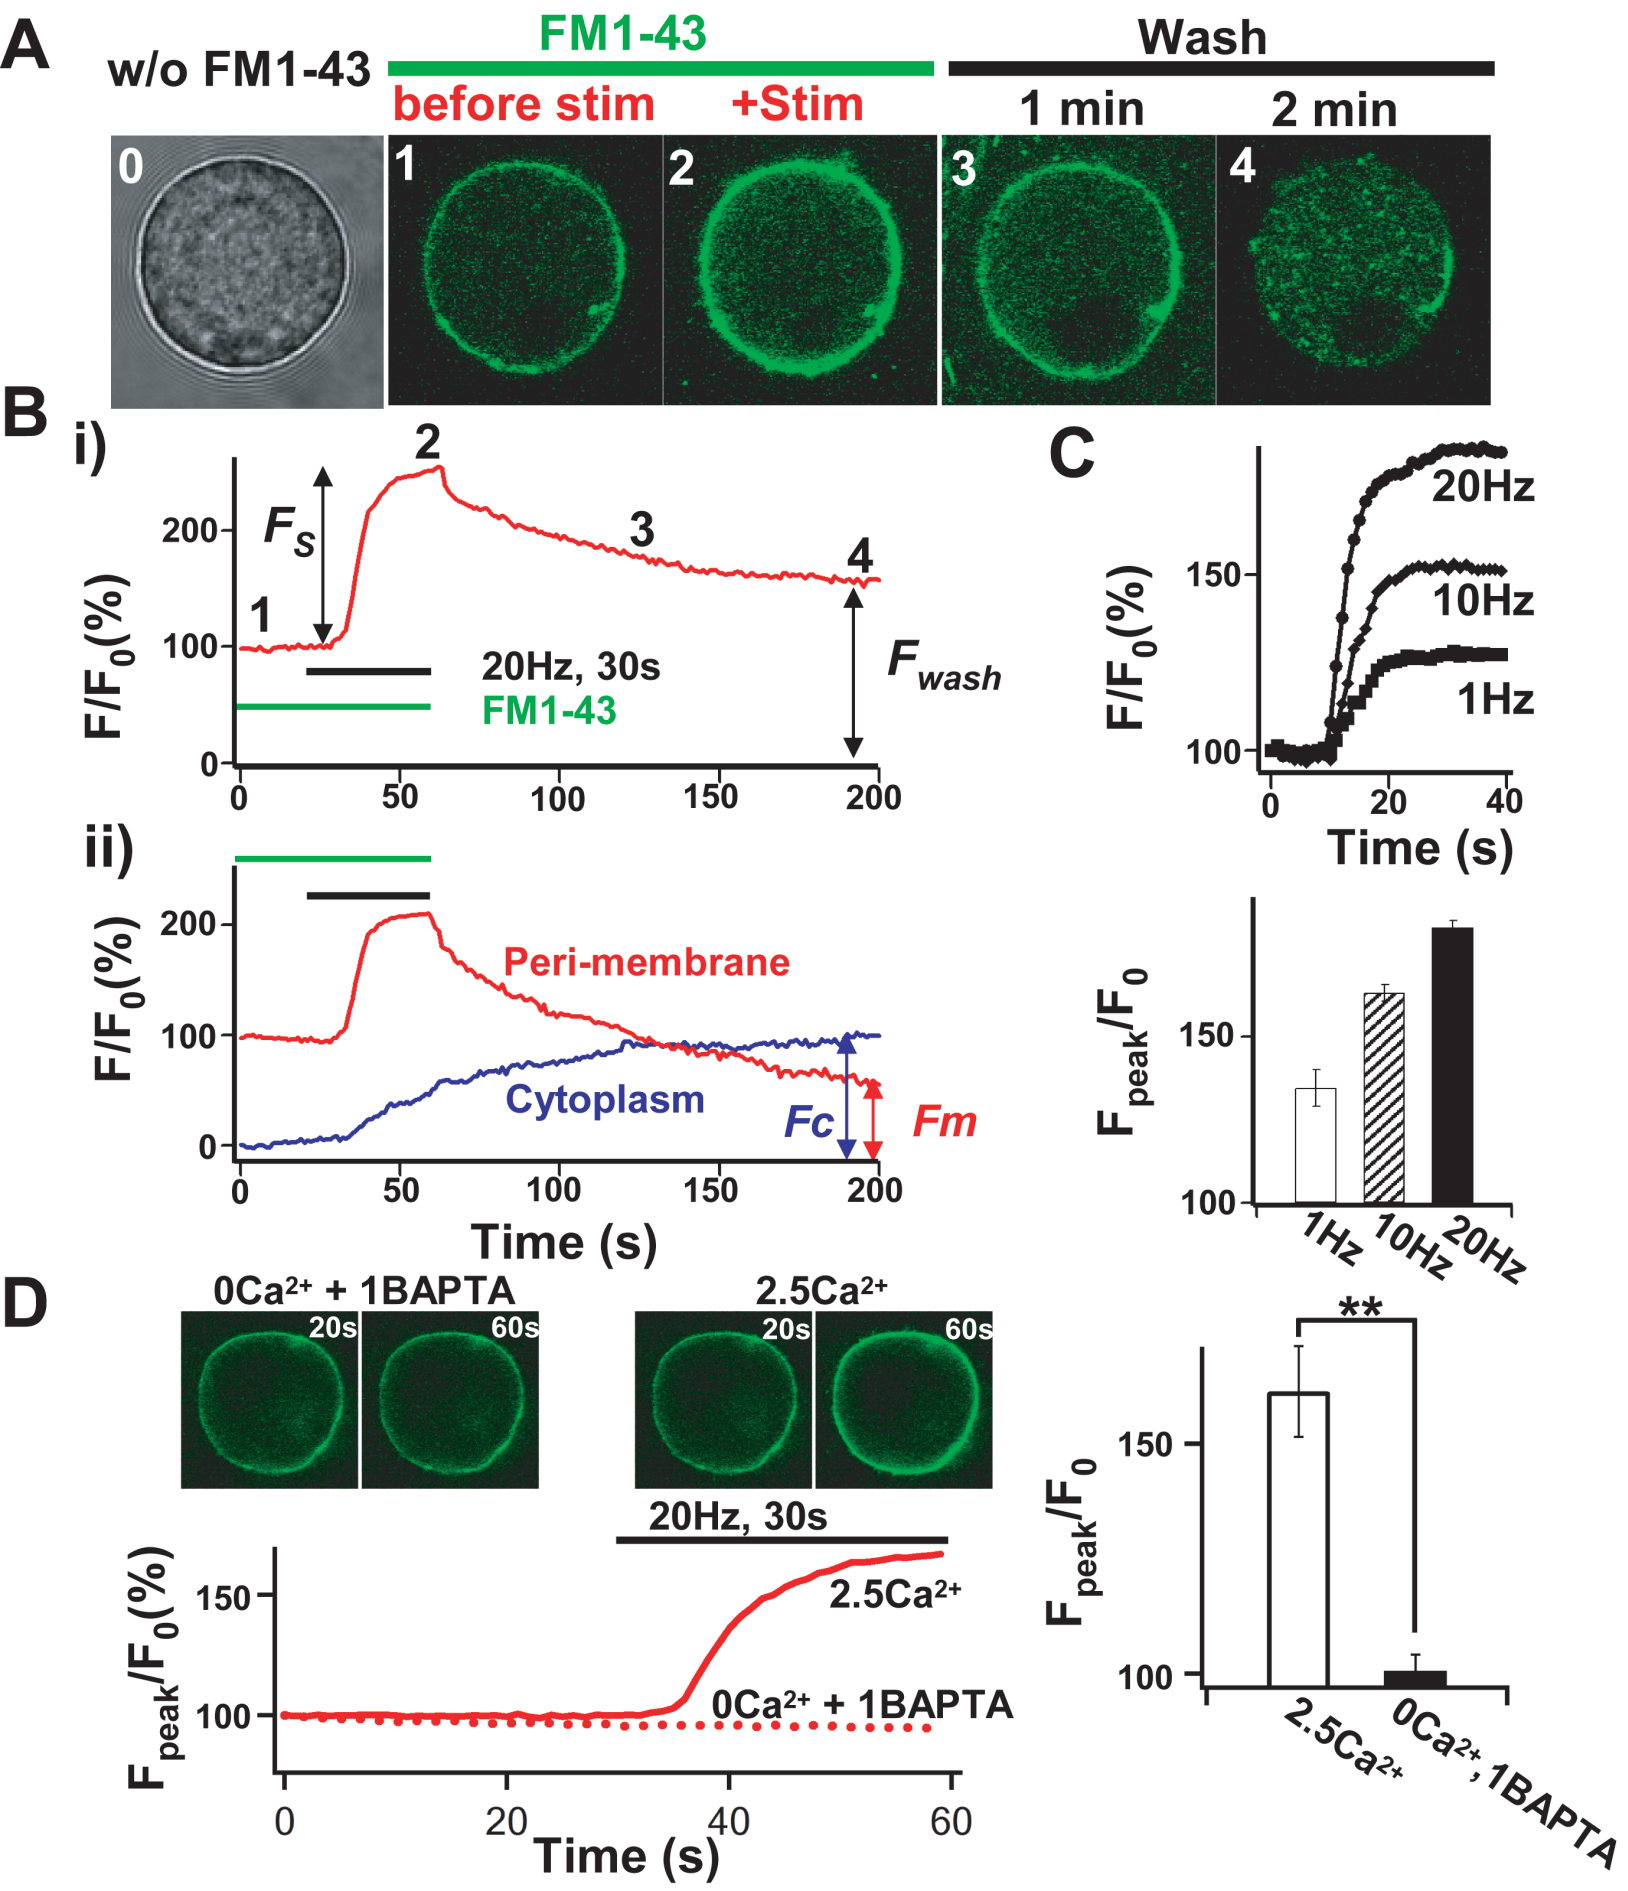

Supplement: pnas_0611048104_2.pdf [file pnas_0611048104_2.pdf]

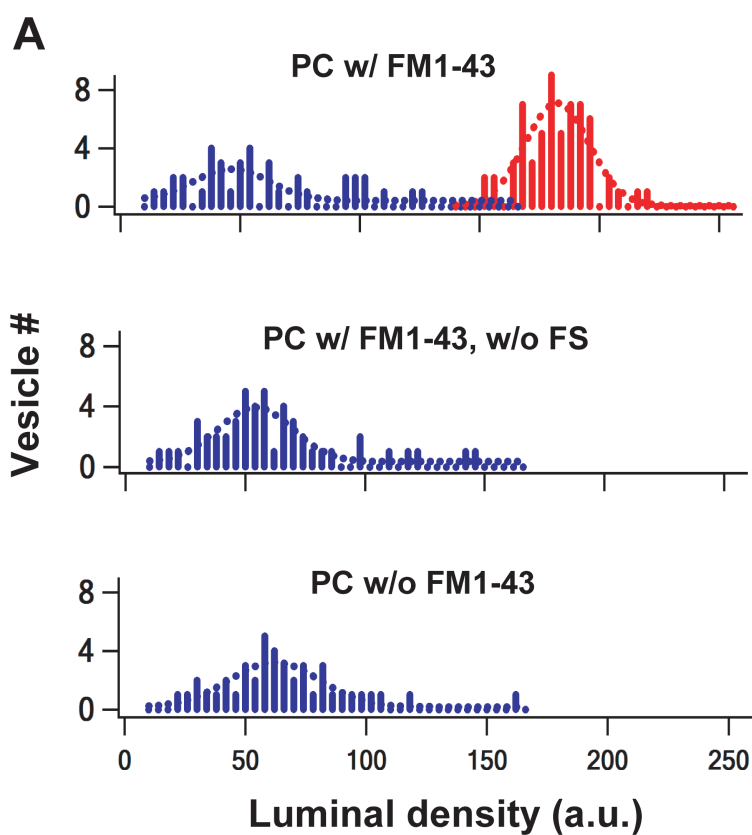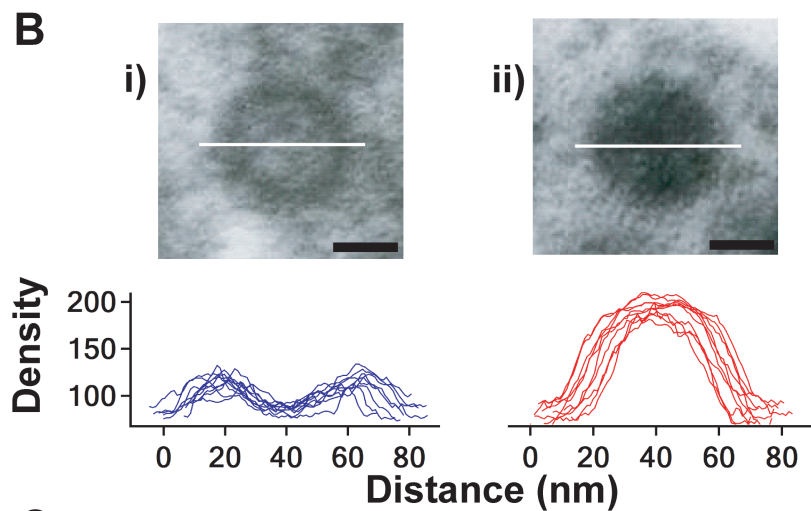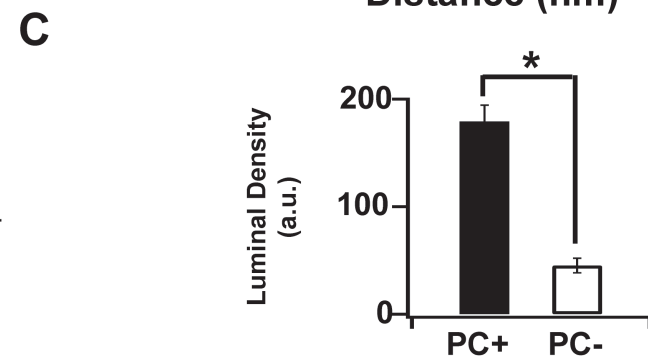

Supplement: pnas_0611048104_3.pdf [file pnas_0611048104_3.pdf]

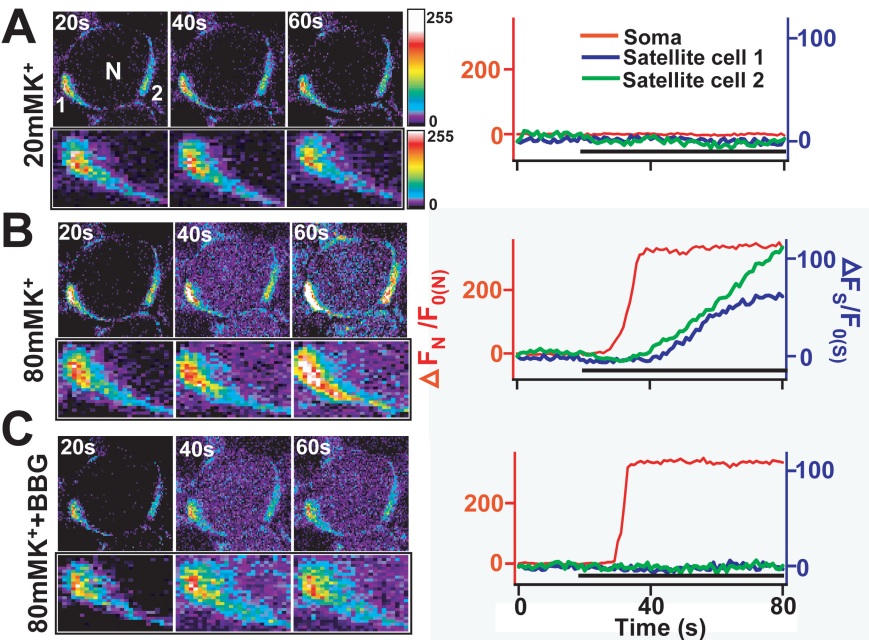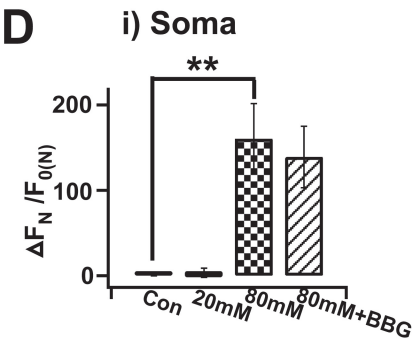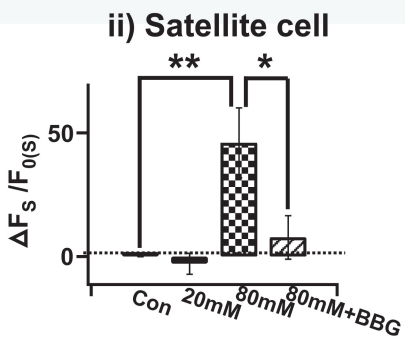

Supplement: pnas_0611048104_4.pdf [file pnas_0611048104_4.pdf]
